# Supplementary material for: Locoregional therapy with α‐emitting trastuzumab against peritoneal metastasis of human epidermal growth factor receptor 2‐positive gastric cancer in mice
Source: PubMed Central journal article supplement — Cancer Sci. 2017 Jun 27;108(8):1648–56. doi: 10.1111/cas.13282 (PMC5543454; doi:10.1111/cas.13282), 2017-06-27
Supplement: CAS-108-1648-s001.pdf [file CAS-108-1648-s001.pdf]

**Supporting Information: Fig. S1**

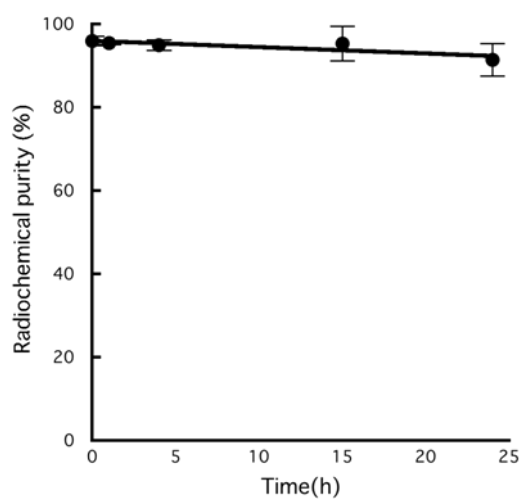

**Fig. S1.** Serum stability of <sup>211</sup>At-trastuzumab up to 24 h after incubation in murine serum, evaluated with RPC by methanol precipitation. Two independent experiments were performed in duplicate ( $n = 2$ ). Mean  $\pm$  SD.
