# Supplementary material for: Locoregional therapy with α‐emitting trastuzumab against peritoneal metastasis of human epidermal growth factor receptor 2‐positive gastric cancer in mice
Source: PubMed Central journal article supplement — Cancer Sci. 2017 Jun 27;108(8):1648–56. doi: 10.1111/cas.13282 (PMC5543454; doi:10.1111/cas.13282), 2017-06-27
Supplement: CAS-108-1648-s002.pdf [file CAS-108-1648-s002.pdf]

Supporting Information: Fig. S2

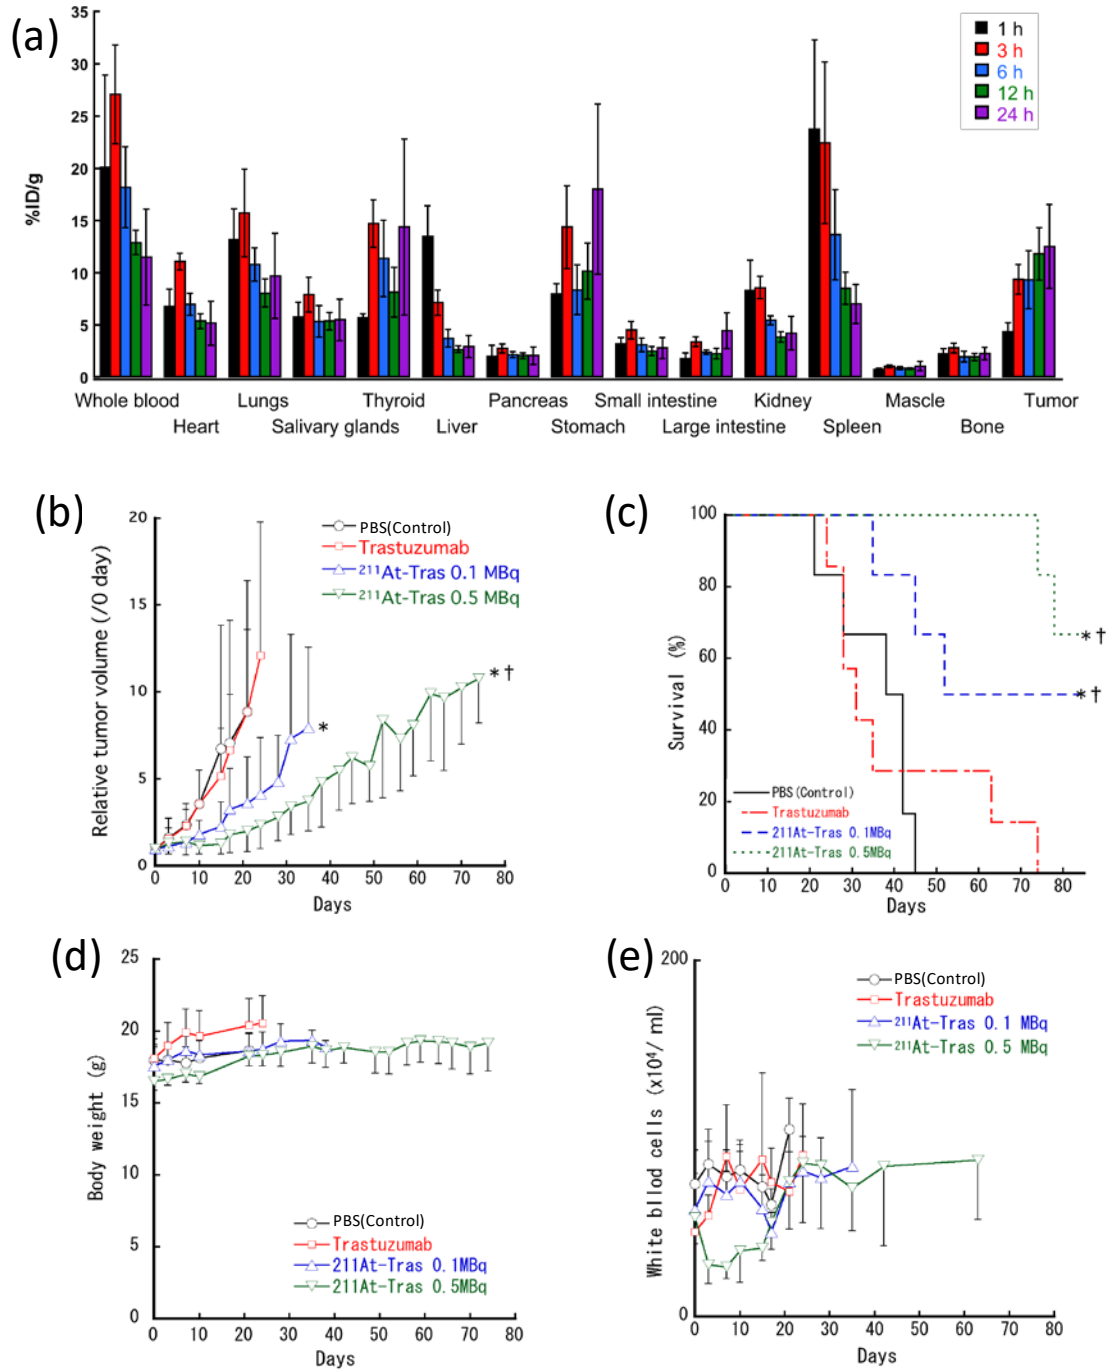

**Fig. S2.** Biodistribution and therapeutic results of  $\alpha$ -RIT using  $^{211}\text{At}$ -trastuzumab in the subcutaneous xenograft mouse models. (a) Biodistribution of  $^{211}\text{At}$ -trastuzumab in mice with a subcutaneous xenograft of N87. Uptakes (%ID/g) of  $^{211}\text{At}$  in the tumor and other

organs at 1, 3, 6, 12, and 24 h after i.v. injection of  $^{211}\text{At}$ -trastuzumab (0.5 MBq). Four mice were used at each time point. Mean  $\pm$  SD. (b) Relative tumor volume in each mouse enrolled in this study. The tumor volume before the treatment was considered 100%. Six mice were enrolled in each of the treatment groups except in the trastuzumab group (seven mice). PBS (Control). Mean  $\pm$  SD ( $P < 0.05$ , \*vs. Control, †vs. Tras.). (c) Kaplan-Meier survival curves of mice ( $P < 0.05$ , \*vs. Control, †vs. Tras.). (d) Body weights of mice after treatment. (e) Numbers of white blood cells of the mice after treatment. Plots in (b), (d), and (e) were interrupted when any mouse enrolled in a group reached the endpoint. Data in (d) and (e) are presented as the mean  $\pm$  SD.
