# Supplementary material for: Locoregional therapy with α‐emitting trastuzumab against peritoneal metastasis of human epidermal growth factor receptor 2‐positive gastric cancer in mice
Source: PubMed Central journal article supplement — Cancer Sci. 2017 Jun 27;108(8):1648–56. doi: 10.1111/cas.13282 (PMC5543454; doi:10.1111/cas.13282), 2017-06-27
Supplement: CAS-108-1648-s003.pdf [file CAS-108-1648-s003.pdf]

Supporting Information: Fig. S3

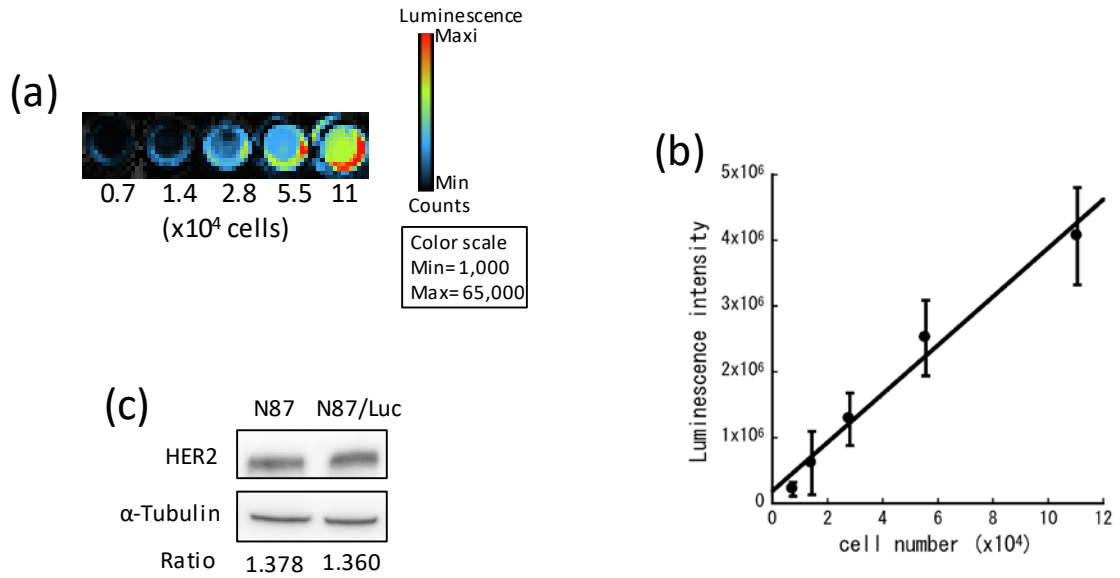

**Fig. S3.** Establishment of N87/Luc cells. (a) Representative luminescence images of various concentrations of N87/Luc cells (0.7–11 × 10<sup>4</sup> cells) after 10-min incubation with luciferin (10 mg/mL, 50 μL/well). (b) Quantification of data in (a). The experiment was performed in quadruple. Mean ± SD. (c) HER2 expression in N87 and N87/Luc cells.  $\alpha$ -tubulin as used as loading control. Ratios of the binding intensity of HER2 relative to  $\alpha$ -tubulin are indicated below the images. N87 blots are identical to those in Figure 1a. N87 and N87/Luc blots were on the same membrane.
