# Supplementary material for: Locoregional therapy with α‐emitting trastuzumab against peritoneal metastasis of human epidermal growth factor receptor 2‐positive gastric cancer in mice
Source: PubMed Central journal article supplement — Cancer Sci. 2017 Jun 27;108(8):1648–56. doi: 10.1111/cas.13282 (PMC5543454; doi:10.1111/cas.13282), 2017-06-27
Supplement: CAS-108-1648-s005.pdf [file CAS-108-1648-s005.pdf]

Supporting Information: Fig. S5

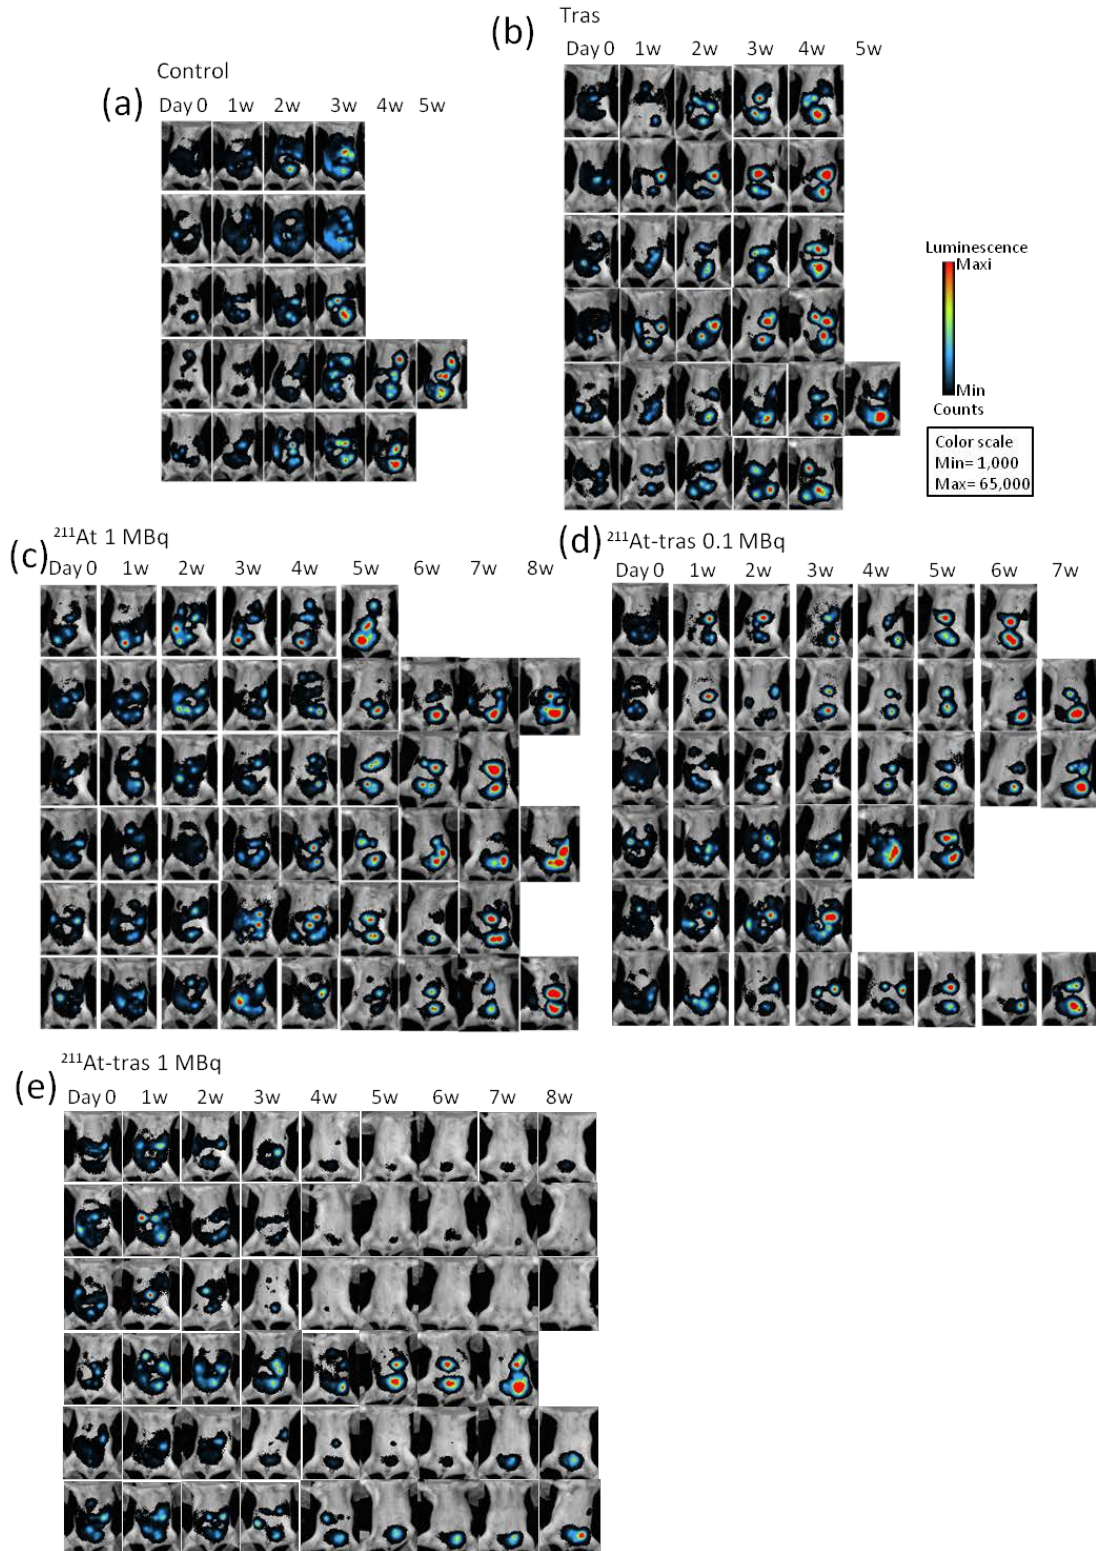

**Fig. S5.** Bioluminescence images of tumor growth in the mice of each group treated with (A) PBS (Control), (B) trastuzumab (Tras), (C)  $^{211}\text{At}$  (1 MBq), or  $^{211}\text{At}$ -trastuzumab [ $^{211}\text{At}$ -Tras; (D) 0.1 or (E) 1 MBq]. Images were taken the day before the treatment (Day 0) and at several time points after treatment. The mice shown in Figure 3 are included in this figure. The color scale indicates the bioluminescence intensity per pixel.
